# Supplementary material for: Direct folding simulation of helical proteins using an effective polarizable bond force field
Source: Royal Society of Chemistry journal article supplement (doi:10.1039/c7cp02101a), 2017-01-01

# Direct folding simulation of helical proteins using an effective polarizable bond force field

Lili Duan,<sup>1,2</sup> Tong Zhu,<sup>2</sup> Changge Ji,<sup>2,3</sup> Qinggang Zhang,<sup>1</sup> and John Z. H. Zhang<sup>\*,2,3,4</sup>

<sup>1</sup>School of Physics and Electronics, Shandong Normal University, Jinan 250014, China

<sup>2</sup>School of Chemistry and Molecular Engineering, East China Normal University, Shanghai 200062, China

<sup>3</sup>NYU-ECNU Center for Computational Chemistry at NYU Shanghai, Shanghai 20062, China

<sup>4</sup>Department of Chemistry, New York University, NY, NY 10003, USA

Correspondence to: john.zhang@nyu.edu

Figure S1 The radius of gyration (Rg) as a function of MD simulation time using AMBER03/EPB03 (A), AMBER12SB/EPB12SB (B) for 2I9M, Trpcage, 1WN8, C34, N36, 2KES, and 2KHK respectively. Blue lines denote those experimental values.

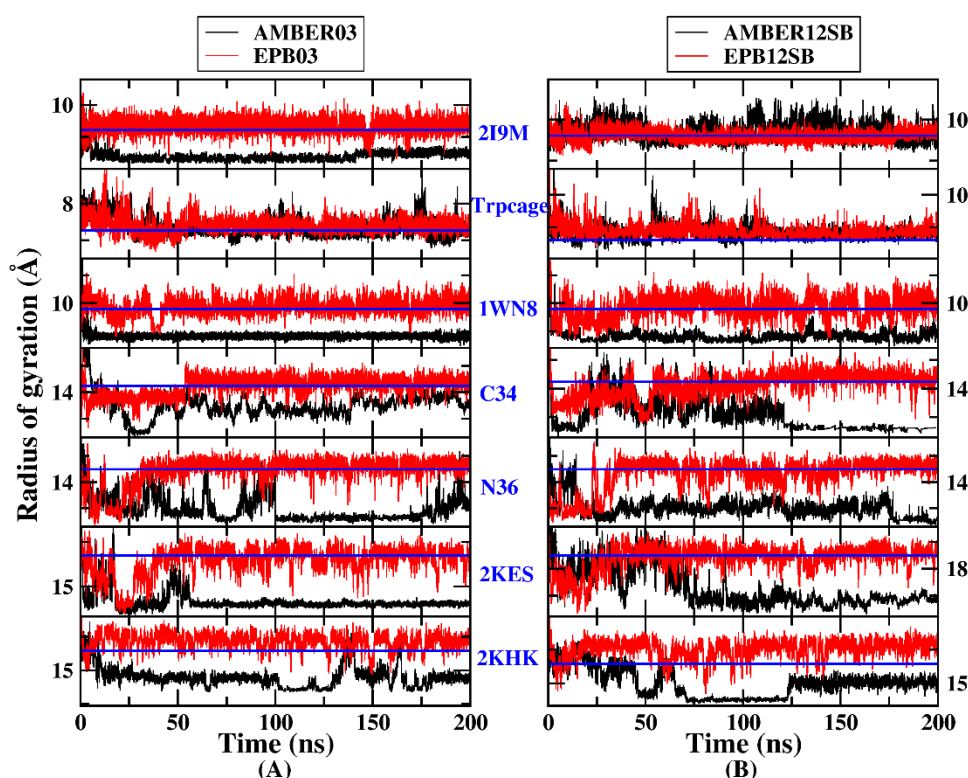

Figure S2 Fractional native helix content averaged every 100 snapshots during MD simulation as a function of time using AMBER03/EPB03 (A), AMBER12SB/EPB12SB (B) for 2I9M, Trpcage, 1WN8, C34, N36, 2KES, and 2KHK respectively.

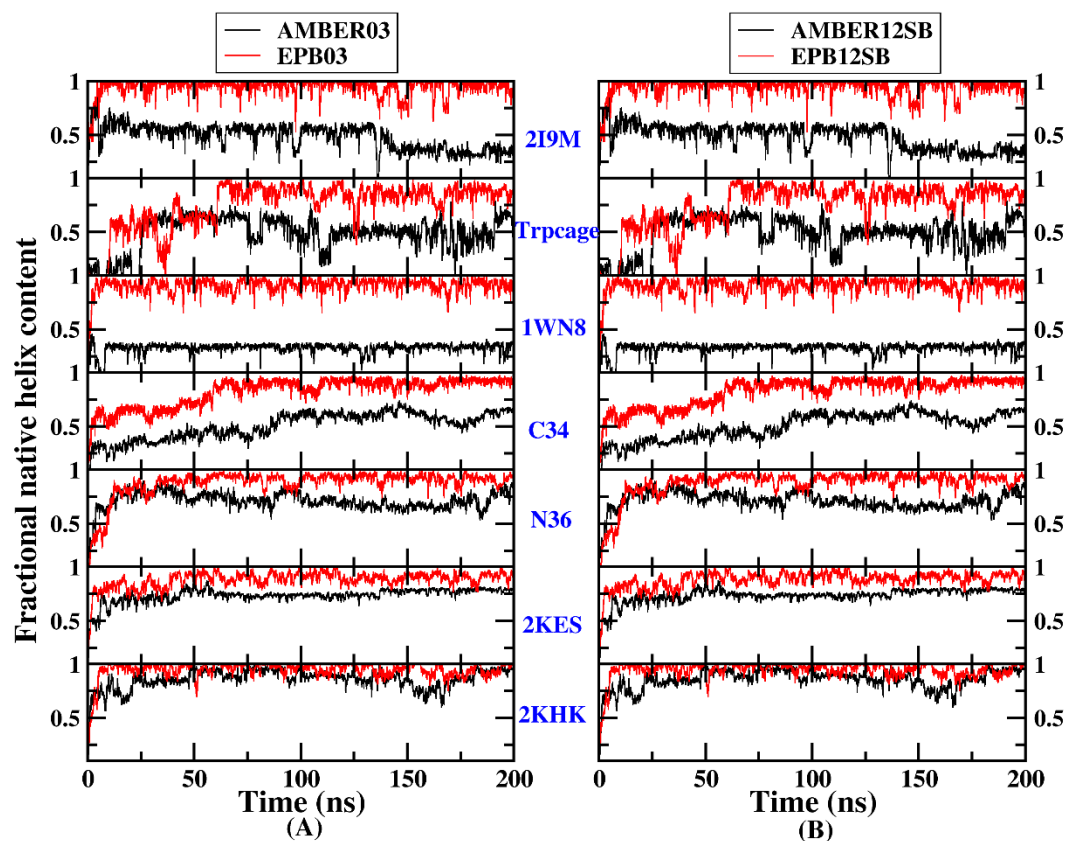

Figure S3 RMSD of backbone atoms as a function of another MD simulation time using AMBER03/EPB03 (A), AMBER12SB/EPB12SB (B) under implicit solvent model for 2I9M, Trpcage, 1WN8, C34, N36, 2KES, and 2KHK respectively.

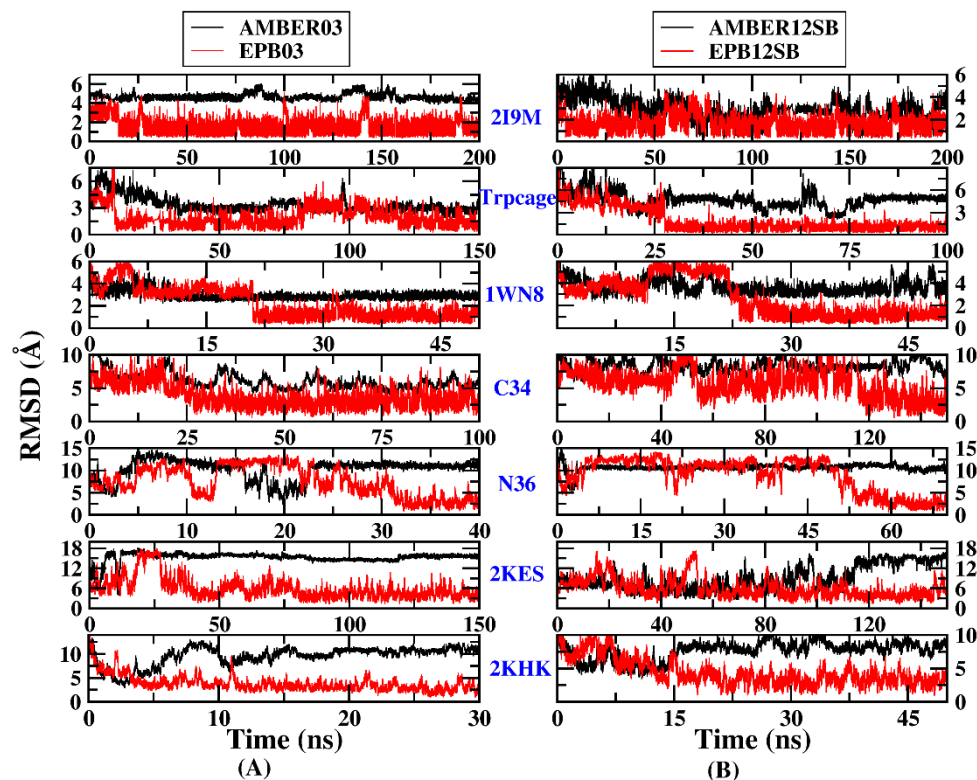

Supplement: c7cp02101a1.pdf [file c7cp02101a1.pdf]
